# Supplementary material for: Reliable Metabolic Flux Estimation in Escherichia coli Central Carbon Metabolism Using Intracellular Free Amino Acids
Source: PubMed Central journal article supplement (PMC4101513; doi:10.3390/metabo4020408), 2014-05-30
Supplement: metabolites-04-00408-s001.pdf [file metabolites-04-00408-s001.pdf]

# Supplementary File

Table S1. Metabolic model.

| Flux number | Reaction                             | Carbon transitions               |
|-------------|--------------------------------------|----------------------------------|
| r1          | Glucose --> G6P                      | ABCDEF --> ABCDEF                |
| r2          | G6P --> F6P                          | ABCDEF --> ABCDEF                |
| r3          | F6P --> G6P                          | ABCDEF --> ABCDEF                |
| r4          | F6P --> FBP                          | ABCDEF --> ABCDEF                |
| r5          | FBP --> DHAP + GAP                   | ABCDEF --> CBA + DEF             |
| r6          | DHAP + GAP --> FBP                   | CBA + DEF --> ABCDEF             |
| r7          | DHAP --> GAP                         | ABC --> ABC                      |
| r8          | GAP --> DHAP                         | ABC --> ABC                      |
| r9          | GAP --> PGA                          | ABC --> ABC                      |
| r10         | PGA --> GAP                          | ABC --> ABC                      |
| r11         | PGA --> PEP                          | ABC --> ABC                      |
| r12         | PEP --> PGA                          | ABC --> ABC                      |
| r13         | PEP --> Pyr                          | ABC --> ABC                      |
| r14         | Pyr --> AcCoA + CO <sub>2</sub> _in  | ABC --> BC + A                   |
| r15         | AcCoA + Oxa --> IsoCit               | AB + CDEF --> FEDBAC             |
| r16         | IsoCit --> αKG + CO <sub>2</sub> _in | ABCDEF --> ABCDE + F             |
| r17         | αKG --> Suc + CO <sub>2</sub> _in    | ABCDE --> BCDE + A               |
| r18         | Suc --> Fum                          | ABCD --> ABCD                    |
| r19         | Fum --> Suc                          | ABCD --> ABCD                    |
| r20         | Fum --> Mal                          | ABCD --> ABCD                    |
| r21         | Mal --> Fum                          | ABCD --> ABCD                    |
| r22         | Mal --> Oxa                          | ABCD --> ABCD                    |
| r23         | Oxa --> Mal                          | ABCD --> ABCD                    |
| r24         | IsoCit + AcCoA --> Mal + Suc         | ABCDEF + GH --> ABHG + FCDE      |
| r25         | PEP + CO <sub>2</sub> _in --> Oxa    | ABC + D --> ABCD                 |
| r26         | Oxa --> PEP + CO <sub>2</sub> _in    | ABCD --> ABC + D                 |
| r27         | Mal --> Pyr + CO <sub>2</sub> _in    | ABCD --> ABC + D                 |
| r28         | G6P --> 6PG                          | ABCDEF --> ABCDEF                |
| r29         | 6PG --> Ru5P + CO <sub>2</sub> _in   | ABCDEF --> BCDEF + A             |
| r30         | Ru5P --> R5P                         | ABCDE --> ABCDE                  |
| r31         | R5P --> Ru5P                         | ABCDE --> ABCDE                  |
| r32         | Ru5P --> Xu5P                        | ABCDE --> ABCDE                  |
| r33         | Xu5P --> Ru5P                        | ABCDE --> ABCDE                  |
| r34         | R5P + Xu5P --> S7P + GAP             | ABCDE + FGHIJ --> FGABCDE + HIJ  |
| r35         | GAP + S7P --> Xu5P + R5P             | HIJ + FGABCDE --> FGHIJ + ABCDE  |
| r36         | GAP + S7P --> F6P + E4P              | ABC + DEF GHIJ --> DEFABC + GHIJ |
| r37         | E4P + F6P --> S7P + GAP              | GHIJ + DEFABC --> DEF GHIJ + ABC |
| r38         | E4P + Xu5P --> F6P + GAP             | ABCD + EFGHI --> EFABCD + GHI    |
| r39         | GAP + F6P --> Xu5P + E4P             | GHI + EFABCD --> EFGHI + ABCD    |
| r40         | 6PG --> Pyr + GAP                    | ABCDEF --> ABC + DEF             |
| r41         | PGA --> Ser                          | ABC --> ABC                      |
| r42         | Ser --> Gly + THF_in                 | ABC --> AB + C                   |
| r43         | Gly + THF_in --> Ser                 | AB + C --> ABC                   |

Table S1. Cont.

| Flux number | Reaction                                      | Carbon transitions |
|-------------|-----------------------------------------------|--------------------|
| r44         | G6P --> [Biomass]                             |                    |
| r45         | F6P --> [Biomass]                             |                    |
| r46         | DHAP --> [Biomass]                            |                    |
| r47         | Ser --> [Biomass]                             |                    |
| r48         | Gly --> [Biomass]                             |                    |
| r49         | PEP --> [Biomass]                             |                    |
| r50         | Pyr --> [Biomass]                             |                    |
| r51         | AcCoA --> [Biomass]                           |                    |
| r52         | $\alpha$ KG --> [Biomass]                     |                    |
| r53         | Oxa --> [Biomass]                             |                    |
| r54         | R5P --> [Biomass]                             |                    |
| r55         | E4P --> [Biomass]                             |                    |
| r56         | Pyr --> [Lactate_ex]                          |                    |
| r57         | Pyr --> AcCoA + [Formate_ex]                  | ABC --> BC + A     |
| r58         | AcCoA --> [Acetate_ex]                        |                    |
| R59         | AcCoA --> [EtOH_ex]                           |                    |
| r60         | CO <sub>2</sub> _in --> [CO <sub>2</sub> _ex] | A --> A            |
| r61         | CO <sub>2</sub> --> CO <sub>2</sub> _in       | A --> A            |
| r62         | THF_in --> [THF_ex]                           | A --> A            |
| r63         | THF --> THF_in                                | A --> A            |

**Figure S1.** Fermentation profile. (a) The time course of optical density at 600 nm (Closed diamond) and the concentration of remained glucose (Closed square) and produced ethanol (Closed triangle) are shown. The concentration of glucose was zero constantly, indicating that glucose-limited chemostat culture was achieved. (b) The time course of organic acids concentration are shown. Closed circle, square, triangle and diamond indicates pyruvate, lactate, formate and acetate, respectively. The concentration was constant after 30 h from the start of culture, indicating that quasi metabolic steady state was assumable.

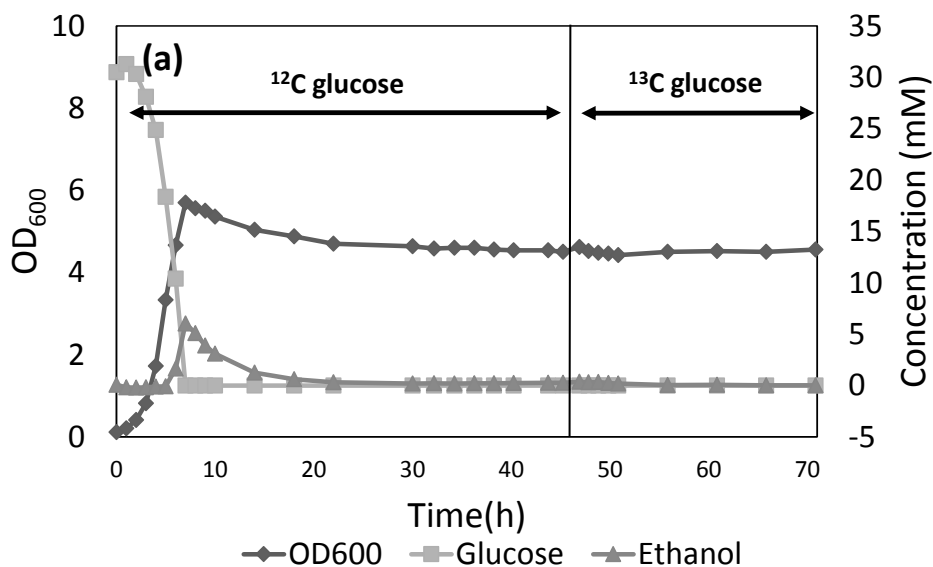

Figure S1. Cont.

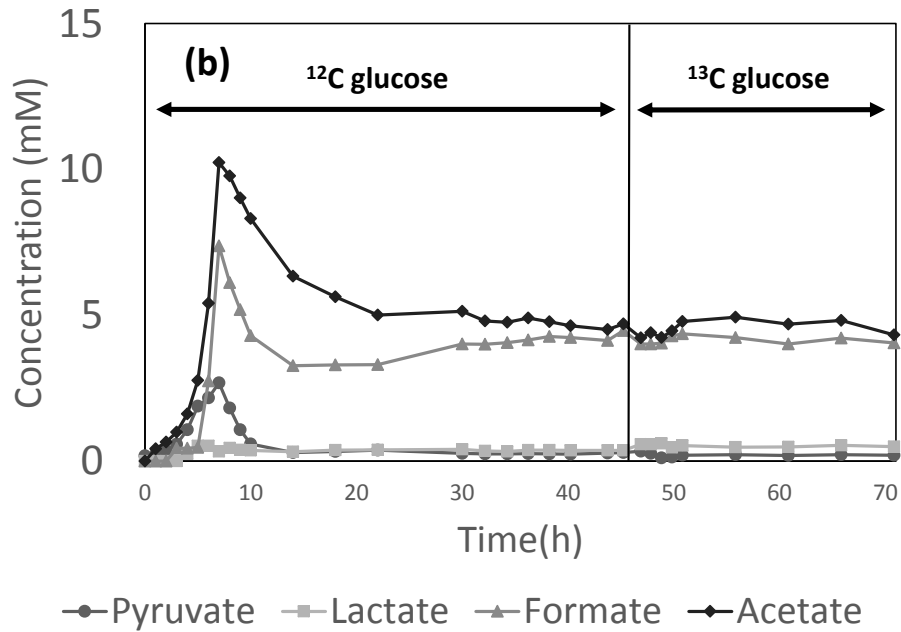

Figure S2. Time course of <sup>13</sup>C enrichment of PAAs and FAAs. Fractional labeling of PAAs (Closed circle) and FAAs (Closed square) after the start of tracer feeding is shown in the figure.

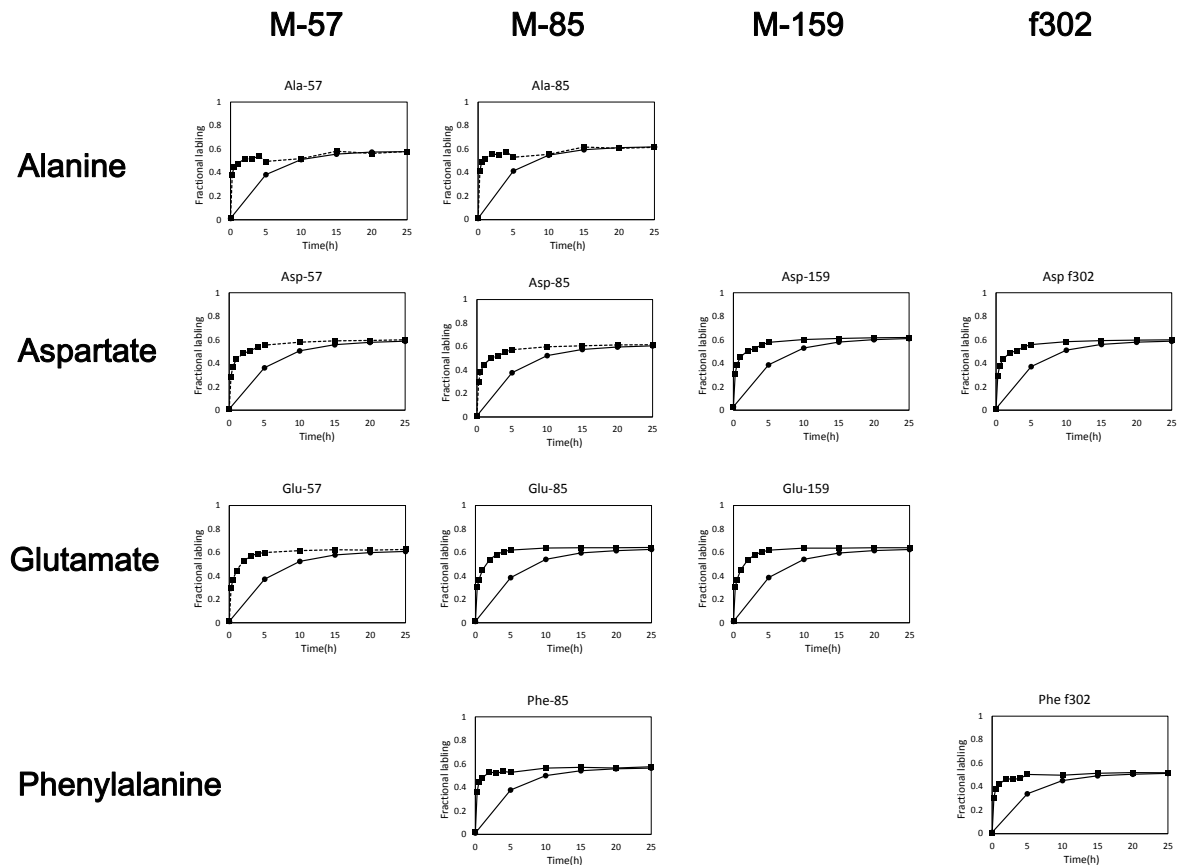

Figure S2. Cont.

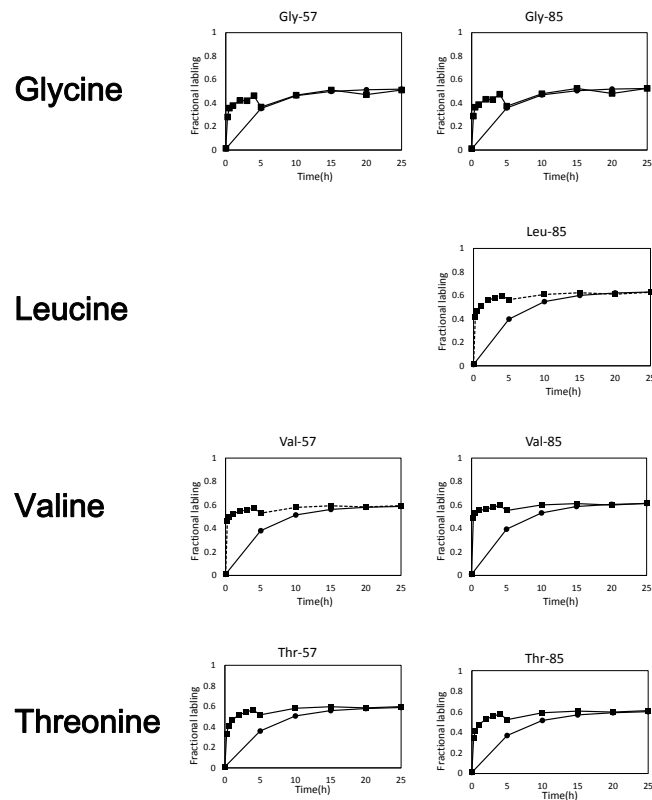

## Supplementary Data 1

## Results of metabolic flux analysis based on the PAAs\_fullset

Table S1-1. Estimated flux distribution and its 95% confidence interval.

| Reaction                      | Lower | Best fit | Upper |
|-------------------------------|-------|----------|-------|
| G6P <-> F6P                   | 74    | 75       | 77    |
| F6P -> FBP                    | 83    | 85       | 86    |
| FBP <-> DHAP + GAP            | 83    | 85       | 86    |
| DHAP <-> GAP                  | 82    | 84       | 85    |
| GAP <-> PGA                   | 172   | 175      | 176   |
| PGA <-> PEP                   | 164   | 166      | 167   |
| PEP -> Pyr                    | 122   | 129      | 136   |
| Pyr -> AcCoA                  | 122   | 128      | 136   |
| AcCoA + Oxa -> Cit            | 75    | 77       | 78    |
| Cit -> $\alpha$ KG            | 44    | 51       | 58    |
| $\alpha$ KG -> Suc            | 38    | 45       | 52    |
| Suc <-> Fum                   | 69    | 70       | 71    |
| Fum <-> Mal                   | 69    | 70       | 71    |
| Mal <-> Oxa                   | 48    | 53       | 57    |
| Glyoxylate shunt              | 19    | 25       | 32    |
| PEP + CO <sub>2</sub> <-> Oxa | 29    | 34       | 40    |

Table S1-1. Cont.

| Reaction                 | Lower | Best fit | Upper |
|--------------------------|-------|----------|-------|
| Mal -> Pyr               | 36    | 43       | 50    |
| G6P -> 6PG               | 22    | 24       | 25    |
| 6PG -> Ru5P              | 18    | 21       | 24    |
| Ru5P <-> R5P             | 10    | 11       | 12    |
| Ru5P <-> Xu5P            | 8     | 10       | 12    |
| R5P + Xu5P <-> S7P + GAP | 5     | 6        | 7     |
| GAP + S7P <-> E4P + F6P  | 5     | 6        | 7     |
| E4P + Xu5P <-> GAP + F6P | 3     | 4        | 5     |
| ED pathway               | 0     | 3        | 6     |

Table S1-2. Measured and estimated MID of PAAs\_fullset.

| Name        | Mass isotopomer | Measured MID | Estimated MID |
|-------------|-----------------|--------------|---------------|
| PAA_Ala-57  | M               | 0.213        | 0.215         |
|             | M+1             | 0.228        | 0.219         |
|             | M+2             | 0.160        | 0.160         |
|             | M+3             | 0.398        | 0.406         |
| PAA_Ala-85  | M               | 0.248        | 0.249         |
|             | M+1             | 0.269        | 0.270         |
|             | M+2             | 0.483        | 0.481         |
| PAA_Asp-57  | M               | 0.083        | 0.083         |
|             | M+1             | 0.181        | 0.178         |
|             | M+2             | 0.245        | 0.245         |
|             | M+3             | 0.276        | 0.277         |
|             | M+4             | 0.215        | 0.216         |
| PAA_Asp-85  | M               | 0.120        | 0.121         |
|             | M+1             | 0.251        | 0.248         |
|             | M+2             | 0.318        | 0.321         |
|             | M+3             | 0.310        | 0.310         |
| PAA_Asp-159 | M               | 0.119        | 0.121         |
|             | M+1             | 0.247        | 0.248         |
|             | M+2             | 0.320        | 0.321         |
|             | M+3             | 0.313        | 0.310         |
| PAA_Asp302  | M               | 0.267        | 0.270         |
|             | M+1             | 0.290        | 0.287         |
|             | M+2             | 0.443        | 0.443         |
| PAA_Glu-57  | M               | 0.033        | 0.030         |
|             | M+1             | 0.095        | 0.094         |
|             | M+2             | 0.205        | 0.205         |
|             | M+3             | 0.283        | 0.283         |
|             | M+4             | 0.237        | 0.238         |
|             | M+5             | 0.148        | 0.149         |

Table S1-2. Cont.

| Name        | Mass isotopomer | Measured MID | Estimated MID |
|-------------|-----------------|--------------|---------------|
| PAA_Glu-85  | M               | 0.048        | 0.045         |
|             | M+1             | 0.138        | 0.139         |
|             | M+2             | 0.294        | 0.299         |
|             | M+3             | 0.300        | 0.298         |
|             | M+4             | 0.220        | 0.219         |
| PAA_Glu-159 | M               | 0.049        | 0.045         |
|             | M+1             | 0.139        | 0.139         |
|             | M+2             | 0.295        | 0.299         |
|             | M+3             | 0.298        | 0.298         |
|             | M+4             | 0.219        | 0.219         |
| PAA_Phe-57  | M               | 0.023        | 0.020         |
|             | M+1             | 0.045        | 0.043         |
|             | M+2             | 0.082        | 0.080         |
|             | M+3             | 0.120        | 0.118         |
|             | M+4             | 0.139        | 0.136         |
|             | M+5             | 0.171        | 0.172         |
|             | M+6             | 0.143        | 0.147         |
|             | M+7             | 0.123        | 0.125         |
|             | M+8             | 0.086        | 0.087         |
| M+9         | 0.067           | 0.074        |               |
| PAA_Phe-85  | M               | 0.026        | 0.021         |
|             | M+1             | 0.049        | 0.048         |
|             | M+2             | 0.117        | 0.117         |
|             | M+3             | 0.139        | 0.134         |
|             | M+4             | 0.169        | 0.171         |
|             | M+5             | 0.142        | 0.143         |
|             | M+6             | 0.162        | 0.165         |
|             | M+7             | 0.118        | 0.117         |
| M+8         | 0.078           | 0.084        |               |
| PAA_Phe302  | M               | 0.424        | 0.420         |
|             | M+1             | 0.129        | 0.128         |
|             | M+2             | 0.447        | 0.451         |
| PAA_Gly-57  | M               | 0.419        | 0.425         |
|             | M+1             | 0.130        | 0.123         |
|             | M+2             | 0.451        | 0.452         |
| PAA_Gly-85  | M               | 0.480        | 0.481         |
|             | M+1             | 0.520        | 0.519         |
| PAA_Ile-85  | M               | 0.034        | 0.030         |
|             | M+1             | 0.092        | 0.094         |
|             | M+2             | 0.199        | 0.205         |
|             | M+3             | 0.283        | 0.283         |
|             | M+4             | 0.239        | 0.238         |
| M+5         | 0.153           | 0.149        |               |

Table S1-2. Cont.

| Name        | Mass isotopomer | Measured MID | Estimated MID |
|-------------|-----------------|--------------|---------------|
| PAA_Ile-159 | M               | 0.034        | 0.030         |
|             | M+1             | 0.093        | 0.094         |
|             | M+2             | 0.202        | 0.205         |
|             | M+3             | 0.285        | 0.283         |
|             | M+4             | 0.239        | 0.238         |
|             | M+5             | 0.147        | 0.149         |
| PAA_Leu-85  | M               | 0.024        | 0.020         |
|             | M+1             | 0.084        | 0.085         |
|             | M+2             | 0.186        | 0.191         |
|             | M+3             | 0.295        | 0.296         |
|             | M+4             | 0.248        | 0.251         |
|             | M+5             | 0.162        | 0.158         |
| PAA_Ser-57  | M               | 0.189        | 0.189         |
|             | M+1             | 0.278        | 0.270         |
|             | M+2             | 0.155        | 0.166         |
|             | M+3             | 0.378        | 0.375         |
| PAA_Ser-85  | M               | 0.206        | 0.207         |
|             | M+1             | 0.366        | 0.367         |
|             | M+2             | 0.429        | 0.426         |
| PAA_Ser-159 | M               | 0.208        | 0.207         |
|             | M+1             | 0.369        | 0.367         |
|             | M+2             | 0.423        | 0.426         |
| PAA_Val-57  | M               | 0.059        | 0.054         |
|             | M+1             | 0.117        | 0.113         |
|             | M+2             | 0.204        | 0.202         |
|             | M+3             | 0.250        | 0.250         |
|             | M+4             | 0.182        | 0.187         |
|             | M+5             | 0.188        | 0.195         |
| PAA_Val-85  | M               | 0.067        | 0.062         |
|             | M+1             | 0.134        | 0.135         |
|             | M+2             | 0.310        | 0.313         |
|             | M+3             | 0.258        | 0.260         |
|             | M+4             | 0.231        | 0.231         |
| PAA_Tyr302  | M               | 0.424        | 0.420         |
|             | M+1             | 0.129        | 0.128         |
|             | M+2             | 0.448        | 0.451         |
| PAA_Thr-57  | M               | 0.082        | 0.083         |
|             | M+1             | 0.180        | 0.178         |
|             | M+2             | 0.244        | 0.245         |
|             | M+3             | 0.278        | 0.277         |
|             | M+4             | 0.217        | 0.216         |
| PAA_Thr-85  | M               | 0.121        | 0.121         |
|             | M+1             | 0.251        | 0.248         |
|             | M+2             | 0.323        | 0.321         |
|             | M+3             | 0.305        | 0.310         |

## Supplementary Data 2

## Results of metabolic flux analysis based on the FAAs\_fullset

Table S2-1. Estimated flux distribution and its 95% confidence interval.

| Reaction                      | Lower | Best fit | Upper |
|-------------------------------|-------|----------|-------|
| G6P <-> F6P                   | 69    | 74       | 80    |
| F6P -> FBP                    | 76    | 81       | 86    |
| FBP <-> DHAP + GAP            | 76    | 81       | 86    |
| DHAP <-> GAP                  | 76    | 81       | 85    |
| GAP <-> PGA                   | 167   | 172      | 176   |
| PGA <-> PEP                   | 158   | 163      | 167   |
| PEP -> Pyr                    | 122   | 128      | 142   |
| Pyr -> AcCoA                  | 116   | 133      | 145   |
| AcCoA + Oxa -> Cit            | 75    | 78       | 81    |
| Cit -> $\alpha$ KG            | 37    | 49       | 60    |
| $\alpha$ KG -> Suc            | 30    | 43       | 53    |
| Suc <-> Fum                   | 68    | 71       | 75    |
| Fum <-> Mal                   | 68    | 71       | 75    |
| Mal <-> Oxa                   | 46    | 56       | 68    |
| Glyoxylate shunt              | 18    | 29       | 40    |
| PEP + CO <sub>2</sub> <-> Oxa | 20    | 32       | 43    |
| Mal -> Pyr                    | 30    | 44       | 56    |
| G6P -> 6PG                    | 19    | 25       | 29    |
| 6PG -> Ru5P                   | 9     | 18       | 27    |
| Ru5P <-> R5P                  | 7     | 10       | 14    |
| Ru5P <-> Xu5P                 | 2     | 8        | 14    |
| R5P + Xu5P <-> S7P + GAP      | 2     | 5        | 8     |
| GAP + S7P <-> E4P + F6P       | 2     | 5        | 8     |
| E4P + Xu5P <-> GAP + F6P      | 0     | 3        | 6     |
| ED pathway                    | 0     | 7        | 14    |



**Table S2-2.** Measured and estimated MID of FAAs\_fullset.

| <b>Name</b> | <b>Mass isotopomer</b> | <b>Measured MID</b> | <b>Estimated MID</b> |
|-------------|------------------------|---------------------|----------------------|
| FAA_Ala-57  | M                      | 0.217               | 0.215                |
|             | M+1                    | 0.225               | 0.211                |
|             | M+2                    | 0.173               | 0.173                |
|             | M+3                    | 0.385               | 0.401                |
| FAA_Ala-85  | M                      | 0.252               | 0.254                |
|             | M+1                    | 0.270               | 0.267                |
|             | M+2                    | 0.478               | 0.479                |
| FAA_Asp-57  | M                      | 0.072               | 0.079                |
|             | M+1                    | 0.182               | 0.170                |
|             | M+2                    | 0.252               | 0.257                |
|             | M+3                    | 0.284               | 0.279                |
|             | M+4                    | 0.210               | 0.215                |
| FAA_Asp-85  | M                      | 0.108               | 0.114                |
|             | M+1                    | 0.256               | 0.247                |
|             | M+2                    | 0.330               | 0.330                |
|             | M+3                    | 0.306               | 0.309                |
| FAA_Asp-159 | M                      | 0.107               | 0.114                |
|             | M+1                    | 0.251               | 0.247                |
|             | M+2                    | 0.330               | 0.330                |
|             | M+3                    | 0.311               | 0.309                |
| FAA_Asp302  | M                      | 0.254               | 0.261                |
|             | M+1                    | 0.299               | 0.295                |
|             | M+2                    | 0.447               | 0.444                |
| FAA_Glu-57  | M                      | 0.014               | 0.029                |
|             | M+1                    | 0.094               | 0.093                |
|             | M+2                    | 0.207               | 0.204                |
|             | M+3                    | 0.288               | 0.285                |
|             | M+4                    | 0.244               | 0.240                |
|             | M+5                    | 0.152               | 0.148                |
| FAA_Glu-85  | M                      | 0.028               | 0.043                |
|             | M+1                    | 0.140               | 0.141                |
|             | M+2                    | 0.298               | 0.297                |
|             | M+3                    | 0.309               | 0.303                |
|             | M+4                    | 0.225               | 0.217                |
| FAA_Glu-159 | M                      | 0.029               | 0.043                |
|             | M+1                    | 0.141               | 0.141                |
|             | M+2                    | 0.299               | 0.297                |
|             | M+3                    | 0.307               | 0.303                |
|             | M+4                    | 0.223               | 0.217                |
| FAA_Phe-85  | M                      | 0.021               | 0.021                |
|             | M+1                    | 0.047               | 0.047                |
|             | M+2                    | 0.113               | 0.115                |
|             | M+3                    | 0.139               | 0.134                |

Table S2-2. Cont.

| Name       | Mass isotopomer | Measured MID | Estimated MID |
|------------|-----------------|--------------|---------------|
|            | M+4             | 0.170        | 0.173         |
|            | M+5             | 0.148        | 0.149         |
|            | M+6             | 0.164        | 0.166         |
|            | M+7             | 0.123        | 0.116         |
|            | M+8             | 0.076        | 0.079         |
| FAA_Phe302 | M               | 0.414        | 0.418         |
|            | M+1             | 0.138        | 0.143         |
|            | M+2             | 0.449        | 0.439         |
| FAA_Gly-57 | M               | 0.425        | 0.421         |
|            | M+1             | 0.154        | 0.141         |
|            | M+2             | 0.421        | 0.439         |
| FAA_Gly-85 | M               | 0.489        | 0.488         |
|            | M+1             | 0.511        | 0.512         |
| FAA_Leu-85 | M               | 0.027        | 0.021         |
|            | M+1             | 0.095        | 0.087         |
|            | M+2             | 0.189        | 0.193         |
|            | M+3             | 0.286        | 0.296         |
|            | M+4             | 0.243        | 0.247         |
|            | M+5             | 0.159        | 0.157         |
| FAA_Val-57 | M               | 0.054        | 0.055         |
|            | M+1             | 0.118        | 0.111         |
|            | M+2             | 0.206        | 0.203         |
|            | M+3             | 0.250        | 0.249         |
|            | M+4             | 0.184        | 0.190         |
|            | M+5             | 0.187        | 0.192         |
| FAA_Val-85 | M               | 0.067        | 0.064         |
|            | M+1             | 0.140        | 0.135         |
|            | M+2             | 0.319        | 0.315         |
|            | M+3             | 0.238        | 0.256         |
|            | M+4             | 0.236        | 0.230         |
| FAA_Tyr302 | M               | 0.422        | 0.418         |
|            | M+1             | 0.136        | 0.143         |
|            | M+2             | 0.442        | 0.439         |
| FAA_Thr-57 | M               | 0.079        | 0.079         |
|            | M+1             | 0.179        | 0.170         |
|            | M+2             | 0.247        | 0.257         |
|            | M+3             | 0.278        | 0.279         |
|            | M+4             | 0.216        | 0.215         |
| FAA_Thr-85 | M               | 0.118        | 0.114         |
|            | M+1             | 0.253        | 0.247         |
|            | M+2             | 0.324        | 0.330         |
|            | M+3             | 0.305        | 0.309         |

## Supplementary Data 3

## Results of metabolic flux analysis using FAAs\_Glu+Asp

Table S3-1. Estimated flux distribution and its 95% confidence interval.

| Reaction                      | Lower | Best fit | Upper |
|-------------------------------|-------|----------|-------|
| G6P <-> F6P                   | 55    | 89       | 99    |
| F6P -> FBP                    | 67    | 91       | 94    |
| FBP <-> DHAP + GAP            | 67    | 91       | 94    |
| DHAP <-> GAP                  | 67    | 90       | 93    |
| GAP <-> PGA                   | 157   | 181      | 184   |
| PGA <-> PEP                   | 149   | 172      | 176   |
| PEP -> Pyr                    | 52    | 183      | 233   |
| Pyr -> AcCoA                  | 99    | 137      | 187   |
| AcCoA + Oxa -> Cit            | 6     | 80       | 84    |
| Cit -> $\alpha$ KG            | 6     | 49       | 84    |
| $\alpha$ KG -> Suc            | 0     | 43       | 77    |
| Suc <-> Fum                   | 63    | 74       | 77    |
| Fum <-> Mal                   | 63    | 74       | 77    |
| Mal <-> Oxa                   | -23   | 105      | 154   |
| Glyoxylate shunt              | 0     | 31       | 77    |
| PEP + CO <sub>2</sub> <-> Oxa | -60   | -14      | 115   |
| Mal -> Pyr                    | 0     | 0        | 196   |
| G6P -> 6PG                    | 0     | 10       | 43    |
| 6PG -> Ru5P                   | 0     | 10       | 43    |
| Ru5P <-> R5P                  | 4     | 8        | 20    |
| Ru5P <-> Xu5P                 | -4    | 2        | 25    |
| R5P + Xu5P <-> S7P + GAP      | -1    | 2        | 30    |
| GAP + S7P <-> E4P + F6P       | -1    | 2        | 30    |
| E4P + Xu5P <-> GAP + F6P      | -3    | 0        | 28    |
| ED pathway                    | 0     | 0        | 26    |

**Table S3-2.** Measured and estimated MID of FAAs\_Glu+Asp+Ala.

| <b>Name</b> | <b>Mass isotopomer</b> | <b>Measured MID</b> | <b>Estimated MID</b> |
|-------------|------------------------|---------------------|----------------------|
| FAA_Asp-57  | M                      | 0.072               | 0.074                |
|             | M+1                    | 0.182               | 0.174                |
|             | M+2                    | 0.252               | 0.253                |
|             | M+3                    | 0.284               | 0.285                |
|             | M+4                    | 0.210               | 0.213                |
| FAA_Asp-85  | M                      | 0.108               | 0.108                |
|             | M+1                    | 0.256               | 0.251                |
|             | M+2                    | 0.330               | 0.333                |
|             | M+3                    | 0.306               | 0.308                |
| FAA_Asp-159 | M                      | 0.107               | 0.108                |
|             | M+1                    | 0.251               | 0.251                |
|             | M+2                    | 0.330               | 0.333                |
|             | M+3                    | 0.311               | 0.308                |
| FAA_Asp302  | M                      | 0.254               | 0.259                |
|             | M+1                    | 0.299               | 0.294                |
|             | M+2                    | 0.447               | 0.447                |
| FAA_Glu-57  | M                      | 0.014               | 0.026                |
|             | M+1                    | 0.094               | 0.091                |
|             | M+2                    | 0.207               | 0.202                |
|             | M+3                    | 0.288               | 0.288                |
|             | M+4                    | 0.244               | 0.246                |
|             | M+5                    | 0.152               | 0.148                |
| FAA_Glu-85  | M                      | 0.028               | 0.039                |
|             | M+1                    | 0.140               | 0.136                |
|             | M+2                    | 0.298               | 0.295                |
|             | M+3                    | 0.309               | 0.310                |
|             | M+4                    | 0.225               | 0.220                |
| FAA_Glu-159 | M                      | 0.029               | 0.039                |
|             | M+1                    | 0.141               | 0.136                |
|             | M+2                    | 0.299               | 0.295                |
|             | M+3                    | 0.307               | 0.310                |
|             | M+4                    | 0.223               | 0.220                |

## Supplementary Data 4

## Results of metabolic flux analysis using FAAs\_Glu+Asp+Ala

Table S4-1. Estimated flux distribution and its 95% confidence interval.

| Reaction                 | Lower | Best fit | Upper |
|--------------------------|-------|----------|-------|
| G6P <-> F6P              | 59    | 73       | 95    |
| F6P -> FBP               | 72    | 85       | 93    |
| FBP <-> DHAP + GAP       | 72    | 85       | 93    |
| DHAP <-> GAP             | 71    | 84       | 92    |
| GAP <-> PGA              | 162   | 175      | 183   |
| PGA <-> PEP              | 153   | 167      | 174   |
| PEP -> Pyr               | 108   | 188      | 222   |
| Pyr -> AcCoA             | 113   | 143      | 179   |
| AcCoA + Oxa -> Cit       | 70    | 75       | 83    |
| Cit -> $\alpha$ KG       | 7     | 34       | 68    |
| $\alpha$ KG -> Suc       | 0     | 28       | 62    |
| Suc <-> Fum              | 64    | 69       | 77    |
| Fum <-> Mal              | 64    | 69       | 77    |
| Mal <-> Oxa              | 34    | 110      | 146   |
| Glyoxylate shunt         | 10    | 41       | 72    |
| PEP + CO2 <-> Oxa        | -54   | -24      | 52    |
| Mal -> Pyr               | 0     | 0        | 77    |
| G6P -> 6PG               | 4     | 26       | 40    |
| 6PG -> Ru5P              | 0     | 25       | 40    |
| Ru5P <-> R5P             | 4     | 13       | 18    |
| Ru5P <-> Xu5P            | -4    | 12       | 23    |
| R5P + Xu5P <-> S7P + GAP | -1    | 7        | 12    |
| GAP + S7P <-> E4P + F6P  | -1    | 7        | 12    |
| E4P + Xu5P <-> GAP + F6P | -3    | 5        | 10    |
| ED pathway               | 0     | 1        | 20    |

**Table S4-2.** Measured and estimated MID of FAAs\_Glu+Asp+Ala.

| <b>Name</b> | <b>Mass isotopomer</b> | <b>Measured MID</b> | <b>Estimated MID</b> |
|-------------|------------------------|---------------------|----------------------|
| FAA_Asp-57  | M                      | 0.072               | 0.074                |
|             | M+1                    | 0.182               | 0.174                |
|             | M+2                    | 0.252               | 0.253                |
|             | M+3                    | 0.284               | 0.285                |
|             | M+4                    | 0.210               | 0.213                |
| FAA_Asp-85  | M                      | 0.108               | 0.108                |
|             | M+1                    | 0.256               | 0.251                |
|             | M+2                    | 0.330               | 0.333                |
|             | M+3                    | 0.306               | 0.308                |
| FAA_Asp-159 | M                      | 0.107               | 0.108                |
|             | M+1                    | 0.251               | 0.251                |
|             | M+2                    | 0.330               | 0.333                |
|             | M+3                    | 0.311               | 0.308                |
| FAA_Asp302  | M                      | 0.254               | 0.259                |
|             | M+1                    | 0.299               | 0.294                |
|             | M+2                    | 0.447               | 0.447                |
| FAA_Glu-57  | M                      | 0.014               | 0.026                |
|             | M+1                    | 0.094               | 0.091                |
|             | M+2                    | 0.207               | 0.202                |
|             | M+3                    | 0.288               | 0.288                |
|             | M+4                    | 0.244               | 0.246                |
|             | M+5                    | 0.152               | 0.148                |
| FAA_Glu-85  | M                      | 0.028               | 0.039                |
|             | M+1                    | 0.140               | 0.136                |
|             | M+2                    | 0.298               | 0.295                |
|             | M+3                    | 0.309               | 0.310                |
|             | M+4                    | 0.225               | 0.220                |
| FAA_Glu-159 | M                      | 0.029               | 0.039                |
|             | M+1                    | 0.141               | 0.136                |
|             | M+2                    | 0.299               | 0.295                |
|             | M+3                    | 0.307               | 0.310                |
|             | M+4                    | 0.223               | 0.220                |

## Supplementary Data 5

## Results of metabolic flux analysis using FAAs\_Glu+Asp+Ala+Phe

Table S5-1. Estimated flux distribution and its 95% confidence interval.

| Reaction                      | Lower | Best fit | Upper |
|-------------------------------|-------|----------|-------|
| G6P <-> F6P                   | 67    | 75       | 88    |
| F6P -> FBP                    | 76    | 84       | 90    |
| FBP <-> DHAP + GAP            | 76    | 84       | 90    |
| DHAP <-> GAP                  | 75    | 83       | 89    |
| GAP <-> PGA                   | 165   | 174      | 181   |
| PGA <-> PEP                   | 157   | 165      | 172   |
| PEP -> Pyr                    | 123   | 141      | 165   |
| Pyr -> AcCoA                  | 125   | 140      | 162   |
| AcCoA + Oxa -> Cit            | 73    | 77       | 83    |
| Cit -> $\alpha$ KG            | 20    | 40       | 58    |
| $\alpha$ KG -> Suc            | 14    | 34       | 52    |
| Suc <-> Fum                   | 67    | 70       | 77    |
| Fum <-> Mal                   | 67    | 70       | 77    |
| Mal <-> Oxa                   | 49    | 66       | 88    |
| Glyoxylate shunt              | 22    | 36       | 54    |
| PEP + CO <sub>2</sub> <-> Oxa | 0     | 21       | 40    |
| Mal -> Pyr                    | 20    | 41       | 59    |
| G6P -> 6PG                    | 10    | 24       | 32    |
| 6PG -> Ru5P                   |       | 20       | 32    |
| Ru5P <-> R5P                  | 4     | 11       | 15    |
| Ru5P <-> Xu5P                 | -4    | 9        | 17    |
| R5P + Xu5P <-> S7P + GAP      | -1    | 6        | 10    |
| GAP + S7P <-> E4P + F6P       | -1    | 6        | 10    |
| E4P + Xu5P <-> GAP + F6P      | -3    | 4        | 8     |
| ED pathway                    | 0     | 3        | 16    |

**Table S5-2.** Measured and estimated MID of FAAs\_Glu+Asp+Ala+Phe.

| <b>Name</b> | <b>Mass isotopomer</b> | <b>Measured MID</b> | <b>Estimated MID</b> |
|-------------|------------------------|---------------------|----------------------|
| FAA_Ala-57  | M                      | 0.217               | 0.212                |
|             | M+1                    | 0.225               | 0.215                |
|             | M+2                    | 0.173               | 0.171                |
|             | M+3                    | 0.385               | 0.401                |
| FAA_Ala-85  | M                      | 0.252               | 0.244                |
|             | M+1                    | 0.270               | 0.277                |
|             | M+2                    | 0.478               | 0.479                |
| FAA_Asp-57  | M                      | 0.072               | 0.077                |
|             | M+1                    | 0.182               | 0.170                |
|             | M+2                    | 0.252               | 0.259                |
|             | M+3                    | 0.284               | 0.280                |
|             | M+4                    | 0.210               | 0.213                |
| FAA_Asp-85  | M                      | 0.108               | 0.111                |
|             | M+1                    | 0.256               | 0.249                |
|             | M+2                    | 0.330               | 0.331                |
|             | M+3                    | 0.306               | 0.308                |
| FAA_Asp-159 | M                      | 0.107               | 0.111                |
|             | M+1                    | 0.251               | 0.249                |
|             | M+2                    | 0.330               | 0.331                |
|             | M+3                    | 0.311               | 0.308                |
| FAA_Asp302  | M                      | 0.254               | 0.261                |
|             | M+1                    | 0.299               | 0.295                |
|             | M+2                    | 0.447               | 0.444                |
| FAA_Glu-57  | M                      | 0.014               | 0.027                |
|             | M+1                    | 0.094               | 0.092                |
|             | M+2                    | 0.207               | 0.203                |
|             | M+3                    | 0.288               | 0.286                |
|             | M+4                    | 0.244               | 0.244                |
|             | M+5                    | 0.152               | 0.148                |
| FAA_Glu-85  | M                      | 0.028               | 0.040                |
|             | M+1                    | 0.140               | 0.138                |
|             | M+2                    | 0.298               | 0.295                |
|             | M+3                    | 0.309               | 0.308                |
|             | M+4                    | 0.225               | 0.218                |
| FAA_Glu-159 | M                      | 0.029               | 0.040                |
|             | M+1                    | 0.141               | 0.138                |
|             | M+2                    | 0.299               | 0.295                |
|             | M+3                    | 0.307               | 0.308                |
|             | M+4                    | 0.223               | 0.218                |



Table S5-2. Cont.

| Name       | Mass isotopomer | Measured MID | Estimated MID |
|------------|-----------------|--------------|---------------|
| FAA_Phe-85 | M               | 0.021        | 0.019         |
|            | M+1             | 0.047        | 0.047         |
|            | M+2             | 0.113        | 0.114         |
|            | M+3             | 0.139        | 0.136         |
|            | M+4             | 0.170        | 0.172         |
|            | M+5             | 0.148        | 0.149         |
|            | M+6             | 0.164        | 0.165         |
|            | M+7             | 0.123        | 0.119         |
|            | M+8             | 0.076        | 0.079         |
| FAA_Phe302 | M               | 0.414        | 0.412         |
|            | M+1             | 0.138        | 0.141         |
|            | M+2             | 0.449        | 0.447         |
